1 **Title**

2 Non-intravenous, carbapenem-sparing antibiotics for the treatment of bacteremia due to  
3 ESBL or Amp-C  $\beta$ -lactamase: A propensity score study.

4

5 **Authors**

6 Y. Meije<sup>1</sup>, C. Pigrau<sup>2,3</sup>, N. Fernández-Hidalgo<sup>2,3</sup>, M. Clemente<sup>1</sup>, L. Ortega<sup>1</sup>, X. Sanz<sup>1</sup>, J.  
7 Loureiro-Amigo<sup>1</sup>, M. Sierra<sup>4</sup>, A. Ayestaran<sup>5</sup>, A. Morales-Cartagena<sup>1</sup>, A. Ribera<sup>1</sup>, J.  
8 Rodríguez-Baño<sup>3,6</sup>, J. Martínez-Montauti<sup>1</sup>

9

10 <sup>1</sup>Infectious Diseases Unit – Internal Medicine Department. Hospital de Barcelona. Societat  
11 Cooperativa d'Instal·lacions Assistencials Sanitàries (SCIAS). Barcelona, Spain.

12 <sup>2</sup>Servei de Malalties Infeccioses. Hospital Universitari Vall d'Hebron. Universitat Autònoma  
13 de Barcelona, Barcelona, Spain.

14 <sup>3</sup>Spanish Network for the Research in Infectious Diseases (REIPI RD12/0015), Instituto de  
15 Salud Carlos III, Madrid, Spain.

16 <sup>4</sup>Microbiology Department. Hospital de Barcelona. Societat Cooperativa d'Instal·lacions  
17 Assistencials Sanitàries (SCIAS). Barcelona, Spain.

18 <sup>5</sup>Pharmacy Department. Hospital de Barcelona. Societat Cooperativa d'Instal·lacions  
19 Assistencials Sanitàries (SCIAS). Barcelona, Spain.

20 <sup>6</sup>Unidad Clínica de Enfermedades Infecciosas, Microbiología y Medicina Preventiva.  
21 Hospital Universitario Virgen Macarena / Departamento de Medicina, Universidad de  
22 Sevilla / Instituto de Biomedicina de Sevilla, Seville, Spain.

23

24 **#Corresponding author**

25 Yolanda Meije, MD, PhD.

26 Infectious Disease Unit - Internal Medicine Department

27 Hospital de Barcelona. SCIAS

28 Diagonal 660, 08034, Barcelona

29 Phone: + 34 932 54 24 00

30 E-mail: [yolandameije@gmail.com](mailto:yolandameije@gmail.com)

31

## 32 **Running Title**

33 Carbapenem-sparing antibiotics for ESBL/Amp-C

34

## 35 **Abbreviations**

36 ESBL: Extended-spectrum  $\beta$ -lactamase

37 Amp-C: Amp-C  $\beta$ -lactamase

38 BL/BLIs:  $\beta$ -lactam/ $\beta$ -lactamase inhibitor combinations

39 IV: Intravenous

40 TMP-SMX: Trimethoprim-Sulfamethoxazole

41

## 42 **Key words**

43 Carbapenem-sparing antibiotics, Enterobacteriaceae bacteremia, stewardship, extended-  
44 spectrum  $\beta$ -lactamase, Amp-C  $\beta$ -lactamase, cotrimoxazole, trimethoprim-  
45 sulfamethoxazole, quinolones, ciprofloxacin.

46

47 Some of the data contained in this article were presented at the 55<sup>th</sup> Interscience  
48 Conference on Antimicrobial Agents and Chemotherapy (ICAAC) and at the 28<sup>th</sup>  
49 International Congress of Chemotherapy Meeting (ICC), San Diego, USA, 2015.

50 **ABSTRACT**

51 Introduction: Carbapenems are considered the treatment of choice for extended-spectrum  
52  $\beta$ -lactamase (ESBL) or Amp-C  $\beta$ -lactamase-producing Enterobacteriaceae bacteremia.  
53 Data on the effectiveness of non-intravenous carbapenem-sparing antibiotic options are  
54 limited.

55 Objective: To compare the 30 day-mortality and clinical failures associated with the use of  
56 carbapenems vs an alternative non-intravenous antibiotic for the definitive treatment of  
57 ESBL/Amp-C positive Enterobacteriaceae bacteremia.

58 Methods: This is a 12-year retrospective study (2004 - 2015) including all patients with  
59 bacteremia due to ESBL/Amp-C-producing Enterobacteriaceae. Given the lack of  
60 randomization of the initial therapies, a propensity score for receiving carbapenems was  
61 calculated.

62 Results: There were 1115 patients with a first episode of bacteremia due to *E. coli* or *K.*  
63 *pneumoniae*, of which 123 were ESBL/Amp C-positive (11%). There were 101 eligible  
64 patients: 59 in the carbapenem group and 42 in the alternative treatment group  
65 (cotrimoxazole 59.5%, quinolones 21.4%). The most frequent sources of infection were  
66 urinary (63%) and biliary (15%). Compared to the carbapenem group, patients treated with  
67 the alternative regimen had a shorter hospital stay (median [IQR]: 7 days [5-10] vs 12 days  
68 [9-18],  $p < 0.001$ ). The use of an alternative non-IV treatment did not increase mortality (OR  
69 0.27; 95% CI 0.05-1.61;  $p = .15$ ). After controlling for confounding factors with the  
70 propensity score, the adjusted OR of carbapenem treatment was 4.95; 95% CI (0.94-  
71 26.01,  $p = .059$ ).

72 Conclusion: Alternative non-IV carbapenem-sparing antibiotics could have a role in the  
73 definitive treatment of ESBL/Amp-C-positive Enterobacteriaceae bloodstream infections,  
74 allowing a reduction in carbapenem use. The use of cotrimoxazole in this setting has  
75 shown favourable results.

76

## 77 INTRODUCTION

78 Extended-spectrum  $\beta$ -lactamase (ESBL) or Amp-C  $\beta$ -lactamase (Amp-C)-producing  
79 Enterobacteriaceae have been increasingly implicated in health care- and community-  
80 associated bacteremia (1). Effective treatment of ESBL or Amp-C bacteremia has become  
81 a major challenge due to frequent resistance to various antibiotics and the existence of  
82 mechanisms of co-resistance in this setting (2). At present, carbapenems are the treatment  
83 of choice for ESBL bacteremia (3). However, increasing carbapenem resistance among  
84 Enterobacteriaceae, as well as in other bacteria, calls for a more judicious approach to  
85 carbapenem use (4).

86  
87 Previous studies of empiric treatment of ESBL Enterobacteriaceae bacteremia with beta-  
88 lactam/beta-lactam inhibitor combinations (BL/BLIs) are contradictory (3, 5–7). These  
89 discrepant results may be due to differences in the source of infection, the genetic  
90 background of the microorganism, or local epidemiology (8). Nevertheless, evidence is  
91 emerging that empiric or definitive treatment with BL/BLIs is probably as effective as  
92 carbapenem therapy in the setting of ESBL (*E. coli* or *K. pneumoniae*) bacteremia (9–11).  
93 Data regarding the usefulness of carbapenem-sparing antibiotics other than BL/BLIs for  
94 definitive treatment have also been reported, though also within an IV regimen (12–14).  
95 The effectiveness of non-intravenous (oral or intramuscular) antibiotic treatment for the  
96 management of ESBL or Amp-C bacteremia has not been widely assessed to date (3, 15).  
97 At our cooperative non-profit private hospital, patients with ESBL or Amp-C  
98 Enterobacteriaceae bacteremia frequently undergo definitive treatment with an orally  
99 administered antimicrobial agent. This hospital encourages close follow-up of patients who  
100 may re-contact their doctor directly if fever or other signs of possible infection appear after  
101 discharge.

102

103 The aim of this study was to compare the 30-day mortality and clinical failure in two  
104 groups: patients receiving carbapenems vs an alternative therapy, based on a non-IV  
105 carbapenem-sparing antibiotic regimen, for the definitive treatment of ESBL or Amp-C-  
106 positive Enterobacteriaceae bacteremia.

107

## 108 **METHODS**

### 109 **Study design, setting and participants**

110 This 12-year retrospective study (January 2004 - December 2015) was conducted at a  
111 tertiary general hospital, with 250 beds in Barcelona, Spain. Patients over age 15 with  
112 community-acquired or healthcare-associated bacteremia due to ESBL or Amp-C-  
113 producing Enterobacteriaceae were included. Patients who died in the first 72h or those  
114 without one-month follow-up were excluded. If patients experienced more than one  
115 bacteremic episode, only the first episode was included. We recorded the prescribed  
116 antibiotic in each case, as selected by the patient's attending physician. All episodes were  
117 identified from the electronic microbiological database. The patients' clinical information  
118 was collected from electronic clinical charts and electronic pharmacological database. The  
119 follow up was performed by either the electronic clinical charts or by telephone if the  
120 patient had been discharged. This study was approved by the institutional review board for  
121 clinical trials.

122

### 123 **End-points**

124 The primary outcome measure was the 30-day mortality rate, and the secondary outcomes  
125 were clinical failure within 30 days of onset of bacteremia and length of hospital stay.

126

### 127 **Variables and Definitions**

128 Bacteremia was defined as the isolation of organisms in one or more separately obtained  
129 blood culture with compatible clinical features. The cases of bacteremia were categorized  
130 as nosocomial, healthcare-associated, or community-acquired in accordance with the  
131 criteria of Friedman et al<sup>16</sup>. Infections were defined as urinary tract, biliary, incisional  
132 wound, soft-tissue, catheter-related or primary bloodstream infection, in accordance with  
133 the Centres for Disease Control and Prevention guidelines (16). The following patients

134 were considered immunocompromised: those receiving corticosteroids at a dose of  $\geq 20$   
135 mg prednisone or equivalent for  $\geq 2$  weeks, those with neutropenia (absolute neutrophil  
136 count below 500/mm<sup>3</sup>) or those receiving anticancer chemotherapy in the previous six  
137 months. Chronic kidney disease (CKD) was defined and staged according to the Kidney  
138 Disease Improving Global Outcomes definition and classification (17). Charlson  
139 comorbidity score was defined as previously described by Charlson et al (18). The severity  
140 of bacteremia on the day of onset was graded with the Pitt bacteremia score (19). Source  
141 control was defined as any kind of intervention apart from antibiotic treatment applied to  
142 solve the infection, such as surgical treatment, abscess drainage or catheter withdrawal.  
143 Sepsis or septic shock was defined according to current definitions (20).

144

145 Antimicrobial therapy was regarded as empirical if administered before the susceptibility  
146 test results were available. Modification of treatment was defined as a change to an active  
147 antibiotic after the culture result became available, in accordance with the pathogen's *in*  
148 *vitro* susceptibility pattern. Definitive therapy was defined as an active antibiotic  
149 administered for > 50% of the total duration of antimicrobial therapy after the antibiogram  
150 result. Treatment was defined as appropriate when an active antimicrobial agent,  
151 determined by *in vitro* susceptibility testing, was administered at the usual recommended  
152 dose. Clinical failure was defined as persistence of bacteremia (i.e. positive blood cultures  
153 for the same Enterobacteriaceae after 72 hours of active antibiotic treatment by *in vitro*  
154 susceptibility), persistence of fever or sepsis, death, or relapse during a 30-day follow-up,  
155 defined as positive blood cultures for the same microorganism (after a previous negative  
156 result). Length of stay was defined as the time from the first positive blood culture to  
157 discharge.

158

159 **Microbiological analysis**

160 Microbiological identification and antibiotic susceptibility tests were carried out using the  
161 MicroScan WalkAway system (Beckman Coulter, Inc., Brea, CA). Presence of ESBL  
162 and/or AMPc was screened in all isolates with diminished susceptibility to cephalosporins  
163 by Microscan System, and confirmed by double disc synergy test (DDST), combination  
164 disc test, gradient test method, or molecular characterization by PCR, according to CLSI  
165 (Clinical & Laboratory Standards Institute) and EUCAST (European Committee on  
166 Antimicrobial Susceptibility Testing) guidelines. The  $\beta$ -lactams used for confirmation,  
167 testing their synergistic effect with amoxicillin-clavulanate were: ceftazidime, cefotaxime,  
168 and aztreonam. The following  $\beta$ -lactams were used for confirmation, testing their  
169 synergistic effect with amoxicillin-clavulanate: ceftazidime, cefotaxim and aztreonam.

170

171 During 2004-2006 period, in vitro susceptibility tests were interpreted based on the CLSI  
172 breakpoints (Clinical and Laboratory Standards Institute: M100: Performance Standards  
173 for Antimicrobial Susceptibility Testing) (21), and during 2007-2015 on the EUCAST  
174 breakpoints (European Committee on Antimicrobial Susceptibility Testing) (22).

175 During the study period, the microbiology department at our hospital did not have access  
176 to PCR for the study of Amp C beta-lactamase-producing *Escherichia coli*. As we were  
177 unable to establish whether *E.coli*-AmpC enzymes were encoded by chromosomal or  
178 plasmid genes, we excluded all AmpC-*E. coli* to prevent potential confounding.

179

## 180 **Statistical analysis**

181 Quantitative variables were expressed as medians and interquartile ranges (IQR);  
182 categorical variables were reported as absolute numbers and percentages. To detect  
183 significant differences between groups, we used the Chi-square test or Fisher exact test  
184 for categorical variables, and the Student t test or Mann-Whitney U test for continuous



185 variables, as appropriate. Independent predictors for 30-day mortality were identified by  
186 logistic regression analysis.

187

188 Given the lack of randomization of the initial therapies, a propensity score for receiving  
189 carbapenems was estimated using a backward stepwise logistic regression model that  
190 included variables with P values  $\leq .25$  in the univariate analysis, plus other variables  
191 considered relevant in deciding the empiric treatment. The following variables were  
192 included: age, sex, Pitt index, active cancer, chronic kidney disease, source of  
193 bloodstream infection, empiric treatment (as appropriate or not) and the time without  
194 effective treatment. An Inverse probability of treatment weighting (IPTW) logistic  
195 regression using the propensity score was fitted to estimate the risk of mortality due to  
196 carbapenem administration. The weights to the propensity score were finally obtained after  
197 fitting a logistic regression model for use of carbapenem as outcome. The model obtained  
198 had an Area under ROC curve of 0.77.

199 The statistical analysis was conducted using SPSS software for Windows, version 17.0  
200 (SPSS Inc., Chicago, IL, USA) and STATA 13.1 (Statacorp College Station, Tx, USA)

201

## 202 RESULTS

203 During the study period, there were 1309 patients with a first episode of bacteremia due to  
204 Enterobacteriaceae (1115 due to *E. coli* or *K. pneumoniae*) of which 123 (11%) were  
205 ESBL or Amp C-positive *E. coli* or *K. pneumoniae*. Twenty two patients were excluded  
206 (Figure 1), resulting in a final cohort of one hundred and one patients, which were grouped  
207 as per type of treatment: 59 in the carbapenem group and 42 in the alternative non-IV  
208 treatment group (TMP-SMX 25, quinolones 9, aminoglycosides 5, fosfomycin 2,  
209 amoxicillin/clavulanate 1).

210

211 The in vitro susceptibility rate for various antibiotics for ESBL/Amp-C-producer strains was  
212 as follows: carbapenem 100%, aminoglycosides 76%, piperacillin/tazobactam 59%, TMP-  
213 SMX 38%, amoxicillin/clavulanate 27% and quinolones 14%.

214

215 The most frequent infection sources were urinary (63%), biliary (15%) and unknown  
216 source (8%), followed by catheter-related (6%), intra-abdominal (5%), surgical wound/soft  
217 tissues (2%) and prosthetic joint infection (1%). The clinical and demographic  
218 characteristics of each group are shown in Table 1. There were no differences between  
219 groups (carbapenems vs alternative therapy) in terms of age, comorbidity, infection  
220 source, severity of underlying disease, time of empiric or definitive treatment. Compared to  
221 the carbapenem group, the patients treated with the alternative regimen had lower median  
222 Pitt score.

223

224 Source control was performed in five patients out of 42 (12%), in the alternative group:  
225 three underwent catheter removal due to a catheter-related bacteremia and two underwent  
226 endoscopic retrograde cholangiopancreatography due to a bacteremia of biliary source.  
227 Source control was performed in ten patients out of 59 (17%), in the carbapenem group:

228 three underwent endoscopic retrograde cholangiopancreatography, five required double J  
229 catheter or percutaneous nephrostomy, one required debridement and implant retention,  
230 and one needed an abdominal surgery.

231

232 During the 30-days of follow up, among the 59 carbapenem treated patients, 6 (10%) died  
233 and 9 (15%) were considered as clinical failure (including the 6 patients who died), of  
234 which 3 were due to bacteremia relapse. In the non-carbapenem group, two patients (5%)  
235 died, which were also considered as clinical failure, and one of them had also previously  
236 developed bacteremia relapse (Table1). The two patients who died in the alternative group  
237 had a disseminated cancer (bladder and colon cancer). Among the 6 patients who died in  
238 the carbapenem group one had a pancreas tumor and the rest of them were patients with  
239 multiple comorbidities.

240

241 Compared to the carbapenem group, the patients treated with the alternative regimen had  
242 a shorter hospital stay (median [IQR]: 7 days [5-10] vs. 12 days [9-18],  $p < 0.001$ ), (table 1).

243

244 In the alternative treatment group, two patients receiving TMP-SMX died due to an ESBL  
245 *E. coli* bacteremia (2/25 - 8%), both of which had advanced neoplastic disease (as  
246 previously described). This percentage is not higher than the 30 day mortality observed in  
247 the carbapenem group (table 1).

248

#### 249 **Alternative group**

250 TMP-SMX was the most frequent therapeutic agent selected in these patients. The clinical  
251 characteristics and source of bacteremia of patients who received alternative therapy as  
252 definitive treatment are shown in table 2, and the complete therapy regimen and length of  
253 therapy in the alternative group in table 3. When patients were switched to non-IV

254 antibiotics, they had received a median of 2.5 days (IQR 0-6 days) of intravenous  
255 appropriate therapy.

256

### 257 **Multivariate and propensity score analysis**

258 In the univariate analysis, nosocomial acquisition (OR 4.08; 95% CI 1.10-15.11; p=.035),  
259 chronic kidney disease (OR 6.22; 95% CI 1.53-25.27; p=.01) and the microorganism (*K.*  
260 *pneumoniae* compared with *E. coli*) (OR 3.85; 95% CI 1.05-14.20; p=.04), were  
261 independent predictors of clinical failure. The use of an alternative non-IV treatment was  
262 not related to mortality (OR 0.27; 95% CI 0.05-1.61; p=.15) (table 4). After controlling for  
263 confounding with the propensity score, the adjusted OR of carbapenem treatment was  
264 4.95; 95% CI (0.94-26.01, p=.059), (table 5).

265

## 266 **DISCUSSION**

267 In this study we have observed that the use of alternative non-IV carbapenem-sparing  
268 antibiotics for definitive treatment of ESBL or Amp-C-positive Enterobacteriaceae  
269 bloodstream infections was not related to greater mortality. In fact we did not find  
270 differences in either the primary outcome, 30-day mortality (6 [10%] vs. 2 [5%],  $p=0.46$ )  
271 nor the secondary outcome, clinical failure (9 [15%] vs. 2 [5 %],  $p=0.12$ ) for carbapenem  
272 group vs. non-IV carbapenem-sparing antibiotics. Moreover, the use of alternative  
273 treatment was associated with a shorter hospital stay.

274

275 Some reports have evaluated the efficacy of IV carbapenem-sparing antibiotics in this  
276 setting, including cephamycins, BL/BLIs or fluoroquinolones, and have presented both  
277 positive (5, 9, 12, 13, 23) and negative outcomes (24, 25). In a metanalysis (3), the use of  
278 empirical quinolones (oral or intravenous) for ESBL Enterobacteriaceae bacteremia was  
279 associated with a higher mortality than carbapenems, but mortality was similar when  
280 quinolones were used as definitive therapy. However, even in the carbapenem-sparing  
281 setting, some studies have shown prior exposure to fluoroquinolones or  $\beta$ -lactam to be  
282 independent risk factors for ESBL or carbapenem-resistant enterobacteriae infections (26,  
283 27). Therefore, these antibiotics would probably not be the best options for the treatment  
284 of these infections.

285

286 To our knowledge, there is no published experience with other oral alternatives such as  
287 TMP-SMX or fosfomycin for the treatment of ESBL Enterobacteriaceae bacteremia (28).  
288 Published experience with TMP-SMX for the treatment of ESBL or Amp-C infections in  
289 patients without bacteremia is also scarce. Park *et al.* showed that non-carbapenem  
290 antibiotics (which include 5 patients treated with TMP-SMX) had a similar efficacy to  
291 carbapenems among a case series of pyelonephritis, however the outcome of patients

292 treated with TMP-SMX was not specified (29). TMP-SMX was the most frequent option  
293 chosen as non-IV, carbapenem-sparing, definitive treatment in our study (mainly for  
294 urinary and biliary sources); no complications were found related to this use. Our  
295 experience with TMP-SMX, after confirming antibiotic susceptibility (38% of the strains of  
296 ESBL infections in our setting), is promising. This option may prevent the emergence of  
297 resistance, it allows for the administration of an oral regimen, and it could shorten the  
298 hospital stay.

299

300 Studies of the efficacy of non-IV carbapenem-sparing agents for infections caused by  
301 ESBL/Amp-C-producing Enterobacteriaceae have focused mainly on urinary tract  
302 infections (30, 31), have not assessed cases of bacteremia, and have addressed mainly  
303 patients with ESBL-*E.coli* infections. Since most of the available drugs (TMP-SMX,  
304 quinolones, fosfomycin) have high urinary levels, further studies should determine if this  
305 alternative non-IV carbapenem-sparing agents are also useful for the treatment of other  
306 bacteremic foci (abdominal) and for ESBL-*Klebsiella* infections.

307

308 Data on non-IV carbapenem-sparing treatments could help reduce carbapenem use,  
309 which is crucial in order to contain the spread of carbapenem resistance (32), to reduce its  
310 impact on global hospital ecology (33), and to shorten hospital stays. As demonstrated,  
311 hospital stays in the alternative treatment group were significantly shorter in our study  
312 population without a negative impact in terms of relapse or early re-admission. The  
313 benefits associated with non-prolonged hospitalization in terms of cost-effectiveness and  
314 comorbidity have been already demonstrated (34).

315

316 This study has certain limitations. The retrospective design could not exclude the  
317 possibility that patients with more severe infections were preferably treated with

318 carbapenems without subsequent treatment with a non-carbapenem. All cases were  
319 included in this retrospective study. Further, the sample size may be too small to achieve  
320 adequate statistical power and selection by indication may bias the results. However we  
321 tried to balance this limitation by adjusting our results using a propensity score analysis,  
322 and did not observe changes in estimation effects. This study may not account for all the  
323 variables that may have influenced the decision to use carbapenems and thus might  
324 influence the OR; similarly, the goodness of model fit for calculating propensity score  
325 weights might be underpowered (AUC=.77). We also could not characterize the ESBL  
326 genes or investigate the MIC distribution for all study isolates. Finally, the study included  
327 mostly bloodstream infections due to *E. coli* which means that these results cannot be  
328 extrapolated to *K. pneumoniae* and mixed ESBL/amp-C-positive Enterobacteriaceae or  
329 other species of the Enterobacteriaceae family.

330

331 In spite of these limitations, the possibility that non-IV antibiotics could be used for the  
332 definitive treatment of (ESBL)-Amp-C-positive Enterobacteriaceae bloodstream infections  
333 is promising. Our data supports the use of TMP-SMX as a carbapenem-sparing alternative  
334 therapy which could reduce carbapenem use and shorten hospital stays. Larger  
335 prospective interventional studies are now required to definitively assess the efficacy of  
336 oral carbapenem-sparing antibiotics for the treatment of ESBL-Amp-C-positive  
337 Enterobacteriaceae bacteremia.

338

339 **ACKNOWLEDGMENTS**

340 We thank Jay A Fishman for his critical review, Santi Pérez Hoyos and Alex Sánchez for  
341 statistical study and Michael Maudsley for English language support and editorial  
342 assistance. CP, NF-H and JR-B are supported by Plan Nacional de I+D+i 2013-2016 and  
343 Instituto de Salud Carlos III, Subdirección General de Redes y Centros de Investigación  
344 Cooperativa, Ministerio de Economía, Industria y Competitividad, Spanish Network for  
345 Research in Infectious Diseases (REIPI RD16/0016/0001 and 0003), which is co-financed  
346 by European Development Regional Fund “A way to achieve Europe” , Operative  
347 Programme Intelligent Growth 2014 - 2020.

348

349 **TRANSPATENCY DECLARATION**

350 The authors have no conflicts of interest to declare.

351



352 **REFERENCES**

- 353 1. Arnaud I, Maugat S, Jarlier V, Astagneau P, National Early Warning, Investigation  
354 and Surveillance of Healthcare-Associated Infections Network (RAISIN)/multidrug  
355 resistance study group. 2015. Ongoing increasing temporal and geographical trends  
356 of the incidence of extended-spectrum beta-lactamase-producing  
357 Enterobacteriaceae infections in France, 2009 to 2013. *Euro Surveill* 20:30014.
- 358 2. Pitout JD, Laupland KB. 2008. Extended-spectrum  $\beta$ -lactamase-producing  
359 Enterobacteriaceae: an emerging public-health concern. *Lancet Infect Dis* 8:159–  
360 166.
- 361 3. Vardakas KZ, Tansarli GS, Rafailidis PI, Falagas ME. 2012. Carbapenems versus  
362 alternative antibiotics for the treatment of bacteraemia due to Enterobacteriaceae  
363 producing extended-spectrum  $\beta$ -lactamases: a systematic review and meta-analysis.  
364 *J Antimicrob Chemother* 67:2793–2803.
- 365 4. Albiger B, Glasner C, Struelens MJ, Grundmann H, Monnet DL, European Survey of  
366 Carbapenemase-Producing Enterobacteriaceae (EuSCAPE) working group. 2015.  
367 Carbapenemase-producing Enterobacteriaceae in Europe: assessment by national  
368 experts from 38 countries, May 2015. *Euro Surveill* 20:30062.
- 369 5. Rodríguez-Baño J, Navarro MD, Retamar P, Picón E, Pascual Á, Extended-  
370 Spectrum Beta-Lactamases–Red Española de Investigación en Patología  
371 Infecciosa/Grupo de Estudio de Infección Hospitalaria Group. 2012.  $\beta$ -Lactam/ $\beta$ -  
372 lactam inhibitor combinations for the treatment of bacteremia due to extended-  
373 spectrum  $\beta$ -lactamase-producing *Escherichia coli*: a post hoc analysis of prospective  
374 cohorts. *Clin Infect Dis* 54:167–74.
- 375 6. Tamma PD, Han JH, Rock C, Harris AD, Lautenbach E, Hsu AJ, Avdic E, Cosgrove  
376 SE, Antibacterial Resistance Leadership Group. 2015. Carbapenem therapy is  
377 associated with improved survival compared with piperacillin-tazobactam for patients

- 378 with extended-spectrum  $\beta$ -lactamase bacteremia. *Clin Infect Dis* 60:1319–25.
- 379 7. Ofer-Friedman H, Shefler C, Sharma S, Tirosh A, Tal-Jasper R, Kandipalli D,  
380 Sharma S, Bathina P, Kaplansky T, Maskit M, Azouri T, Lazarovitch T, Zaidenstein  
381 R, Kaye KS, Marchaim D. 2015. Carbapenems Versus Piperacillin-Tazobactam for  
382 Bloodstream Infections of Nonurinary Source Caused by Extended-Spectrum Beta-  
383 Lactamase-Producing Enterobacteriaceae. *Infect Control Hosp Epidemiol* 36:981–5.
- 384 8. Perez F, Bonomo RA. 2015. Bloodstream Infection Caused by Extended-  
385 Spectrum  $\beta$ -Lactamase-Producing Gram-Negative Bacteria: How to Define the Best  
386 Treatment Regimen? *Clin Infect Dis* 60:1326–9.
- 387 9. Gutiérrez-Gutiérrez B, Pérez-Galera S, Salamanca E, de Cueto M, Calbo E,  
388 Almirante B, Viale P, Oliver A, Pintado V, Gasch O, Martínez-Martínez L, Pitout J,  
389 Akova M, Peña C, Molina J, Hernández A, Venditti M, Prim N, Origüen J, Bou G,  
390 Tacconelli E, Tumbarello M, Hamprecht A, Giamarellou H, Almela M, Pérez F,  
391 Schwaber MJ, Bermejo J, Lowman W, Hsueh P-R, Mora-Rillo M, Natera C, Souli M,  
392 Bonomo RA, Carmeli Y, Paterson DL, Pascual A, Rodríguez-Baño J. 2016. A  
393 Multinational, Preregistered Cohort Study of  $\beta$ -Lactam/ $\beta$ -Lactamase Inhibitor  
394 Combinations for Treatment of Bloodstream Infections Due to Extended-Spectrum-  
395  $\beta$ -Lactamase-Producing Enterobacteriaceae. *Antimicrob Agents Chemother*  
396 60:4159–69.
- 397 10. Ng TM, Khong WX, Harris PNA, De PP, Chow A, Tambyah PA, Lye DC. 2016.  
398 Empiric Piperacillin-Tazobactam versus Carbapenems in the Treatment of  
399 Bacteraemia Due to Extended-Spectrum Beta-Lactamase-Producing  
400 Enterobacteriaceae. *PLoS One* 11:e0153696.
- 401 11. Gudiol C, Royo-Cebrecos C, Abdala E, Akova M, Álvarez R, Maestro-de la Calle G,  
402 Cano A, Cervera C, Clemente WT, Martín-Dávila P, Freifeld A, Gómez L, Gottlieb T,  
403 Gurguí M, Herrera F, Manzur A, Maschmeyer G, Meije Y, Montejo M, Peghin M,

- 404           Rodríguez-Baño J, Ruiz-Camps I, Sukiennik TC, Tebe C, Carratalà J, BICAR Study  
405           Group. 2017. Efficacy of  $\beta$ -Lactam/ $\beta$ -Lactamase Inhibitor Combinations for the  
406           Treatment of Bloodstream Infection Due to Extended-Spectrum- $\beta$ -Lactamase-  
407           Producing Enterobacteriaceae in Hematological Patients with Neutropenia.  
408           Antimicrob Agents Chemother 61:e00164-17.
- 409   12.   Matsumura Y, Yamamoto Enterobacteriaceae M, Nagao M, Komori T, Fujita N,  
410           Hayashi A, Shimizu T, Watanabe H, Doi S, Tanaka M, Takakura S, Ichiyama S.  
411           2015. Multicenter Retrospective Study of Cefmetazole and Flomoxef for Treatment  
412           of Extended-Spectrum- $\beta$ -Lactamase-Producing *Escherichia coli* Bacteremia.  
413           Antimicrob Agents Chemother 59:5107–5113.
- 414   13.   Lo C-L, Lee C-C, Li C-W, Li M-C, Hsueh P-R, Lee N-Y, Ko W-C. 2017.  
415           Fluoroquinolone therapy for bloodstream infections caused by extended-spectrum  
416           beta-lactamase-producing *Escherichia coli* and *Klebsiella pneumoniae*. J Microbiol  
417           Immunol Infect 50:355–361.
- 418   14.   Palacios-Baena ZR, Gutiérrez-Gutiérrez B, Calbo E, Almirante B, Viale P, Oliver A,  
419           Pintado V, Gasch O, Martínez-Martínez L, Pitout J, Akova M, Peña C, Molina Gil-  
420           Bermejo J, Hernández A, Venditti M, Prim N, Bou G, Tacconelli E, Tumbarello M,  
421           Hamprecht A, Giamarellou H, Almela M, Pérez F, Schwaber MJ, Bermejo J,  
422           Lowman W, Hsueh P-R, Paño-Pardo JR, Torre-Cisneros J, Souli M, Bonomo RA,  
423           Carmeli Y, Paterson DL, Pascual Á, Rodríguez-Baño J, Spanish Network for  
424           Research in Infectious Diseases (REIPI)/European Study Group of Bloodstream  
425           Infections and Sepsis (ESGBIS)/INCREMENT Group. 2017. Empiric Therapy With  
426           Carbapenem-Sparing Regimens for Bloodstream Infections due to Extended-  
427           Spectrum  $\beta$ -Lactamase-Producing Enterobacteriaceae: Results From the  
428           INCREMENT Cohort. Clin Infect Dis 65:1615–1623.
- 429   15.   Rodríguez-Baño J, Cisneros JM, Cobos-Trigueros N, Fresco G, Navarro-San

- 430 Francisco C, Gudiol C, Horcajada JP, López-Cerero L, Martínez JA, Molina J,  
431 Montero M, Paño-Pardo JR, Pascual A, Peña C, Pintado V, Retamar P, Tomás M,  
432 Borges-Sa M, Garnacho-Montero J, Bou G, Study Group of Nosocomial Infections  
433 (GEIH) of the Spanish Society of Infectious Diseases, Infectious Diseases (SEIMC).  
434 2015. Executive summary of the diagnosis and antimicrobial treatment of invasive  
435 infections due to multidrug-resistant Enterobacteriaceae. Guidelines of the Spanish  
436 Society of Infectious Diseases and Clinical Microbiology (SEIMC). *Enferm Infecc*  
437 *Microbiol Clin* 33:338–41.
- 438 16. Garner JS, Jarvis WR, Emori TG, Horan TC, Hughes JM. 1988. CDC definitions for  
439 nosocomial infections, 1988. *Am J Infect Control* 16:128–40.
- 440 17. Levey AS, Eckardt K-U, Tsukamoto Y, Levin A, Coresh J, Rossert J, Zeeuw DDE,  
441 Hostetter TH, Lameire N, Eknoyan G. 2005. Definition and classification of chronic  
442 kidney disease: A position statement from Kidney Disease: Improving Global  
443 Outcomes (KDIGO). *Kidney Int* 67:2089–2100.
- 444 18. Charlson ME, Pompei P, Ales KL, MacKenzie CR. 1987. A new method of  
445 classifying prognostic comorbidity in longitudinal studies: development and  
446 validation. *J Chronic Dis* 40:373–83.
- 447 19. Hilf M, Yu VL, Sharp J, Zuravleff JJ, Korvick JA, Muder RR. 1989. Antibiotic therapy  
448 for *Pseudomonas aeruginosa* bacteremia: outcome correlations in a prospective  
449 study of 200 patients. *Am J Med* 87:540–6.
- 450 20. Singer M, Deutschman CS, Seymour CW, Shankar-Hari M, Annane D, Bauer M,  
451 Bellomo R, Bernard GR, Chiche J-D, Coopersmith CM, Hotchkiss RS, Levy MM,  
452 Marshall JC, Martin GS, Opal SM, Rubenfeld GD, van der Poll T, Vincent J-L, Angus  
453 DC. 2016. The Third International Consensus Definitions for Sepsis and Septic  
454 Shock (Sepsis-3). *JAMA* 315:801–10.
- 455 21. Performance Standards for Antimicrobial Susceptibility Testing; Sixteenth

- 456 Informational Supplement. M100-S16 Vol 26 n<sup>o</sup>3. January 2006. Clinical and  
457 Laboratory Standards Institute.
- 458 22. The European Committee on Antimicrobial Susceptibility Testing. Breakpoint tables  
459 for interpretation of MICs and zone diameters. Version 5.0, 2015.  
460 <http://www.eucast.org>.
- 461 23. Fukuchi T, Iwata K, Kobayashi S, Nakamura T, Ohji G. 2016. Cefmetazole for  
462 bacteremia caused by ESBL-producing Enterobacteriaceae comparing with  
463 carbapenems. BMC Infect Dis 16:427.
- 464 24. Lee C-H, Su L-H, Chen F-J, Tang Y-F, Chien C-C, Liu J-W. 2015. Clinical and  
465 microbiologic characteristics of adult patients with recurrent bacteraemia caused by  
466 extended-spectrum  $\beta$ -lactamase-producing *Escherichia coli* or *Klebsiella*  
467 *pneumoniae*. Clin Microbiol Infect 21:1105.e1-8.
- 468 25. Wu U-I, Chen W-C, Yang C-S, Wang J-L, Hu F-C, Chang S-C, Chen Y-C. 2012.  
469 Ertapenem in the treatment of bacteremia caused by extended-spectrum beta-  
470 lactamase-producing *Escherichia coli*: a propensity score analysis. Int J Infect Dis  
471 16:e47-52.
- 472 26. Falagas ME, Rafailidis PI, Kofteridis D, Vartzili S, Chelvatzoglou FC, Papaioannou V,  
473 Maraki S, Samonis G, Michalopoulos A. 2007. Risk factors of carbapenem-resistant  
474 *Klebsiella pneumoniae* infections: a matched case control study. J Antimicrob  
475 Chemother 60:1124–1130.
- 476 27. Chopra T, Marchaim D, Johnson PC, Chalana IK, Tamam Z, Mohammed M, Alkatib  
477 S, Tansek R, Chaudhry K, Zhao JJ, Pogue JM, Kaye KS. 2015. Risk factors for  
478 bloodstream infection caused by extended-spectrum  $\beta$ -lactamase-producing  
479 *Escherichia coli* and *Klebsiella pneumoniae*: A focus on antimicrobials including  
480 cefepime. Am J Infect Control 43:719–23.
- 481 28. Rodríguez-Baño J, Gutiérrez-Gutiérrez B, Machuca I, Pascual A. 2018. Treatment of

- 482 Infections Caused by Extended-Spectrum-Beta-Lactamase-, AmpC-, and  
483 Carbapenemase-Producing Enterobacteriaceae. Clin Microbiol Rev 31:e00079-17.
- 484 29. Park SH, Choi S-M, Chang YK, Lee D-G, Cho S-Y, Lee H-J, Choi J-H, Yoo J-H.  
485 2014. The efficacy of non-carbapenem antibiotics for the treatment of community-  
486 onset acute pyelonephritis due to extended-spectrum  $\beta$ -lactamase-producing  
487 *Escherichia coli*. J Antimicrob Chemother 69:2848–56.
- 488 30. Ipekci T, Seyman D, Berk H, Celik O. 2014. Clinical and bacteriological efficacy of  
489 amikacin in the treatment of lower urinary tract infection caused by extended-  
490 spectrum beta-lactamase-producing *Escherichia coli* or *Klebsiella pneumoniae*. J  
491 Infect Chemother 20:762–7.
- 492 31. de La Blanchardière A, Dargère S, Guérin F, Daurel C, Saint-Lorant G, Verdon R,  
493 Cattoir V. 2015. Non-carbapenem therapy of urinary tract infections caused by  
494 extended-spectrum  $\beta$ -lactamase-producing Enterobacteriaceae. Med Mal Infect  
495 45:169–72.
- 496 32. Lim CL-L, Lee W, Lee AL-C, Liew LT-T, Nah SC, Wan CN, Chlebicki MP, Kwa AL-H.  
497 2013. Evaluation of Ertapenem use with impact assessment on extended-spectrum  
498 beta-lactamases (ESBL) production and gram-negative resistance in Singapore  
499 General Hospital (SGH). BMC Infect Dis 13:523.
- 500 33. Pletz MWR, Rau M, Bulitta J, De Roux A, Burkhardt O, Kruse G, Kurowski M, Nord  
501 CE, Lode H. 2004. Ertapenem pharmacokinetics and impact on intestinal microflora,  
502 in comparison to those of ceftriaxone, after multiple dosing in male and female  
503 volunteers. Antimicrob Agents Chemother 48:3765–72.
- 504 34. Conley J, O'Brien CW, Leff BA, Bolen S, Zulman D. 2016. Alternative Strategies to  
505 Inpatient Hospitalization for Acute Medical Conditions: A Systematic Review. JAMA  
506 Intern Med 176:1693–1702.

Table 1. Characteristics of patients with bloodstream infections caused by extended-spectrum b-lactamase-producing Enterobacteriaceae according to definitive therapy.

|                               | Definitive treatment  |                                  | <i>p</i>    |
|-------------------------------|-----------------------|----------------------------------|-------------|
|                               | Carbapenem<br>N=59 pt | Alternative treatment<br>N=42 pt |             |
| Age, years, median, (IQR)     | 79 (70-86)            | 72 (66-84)                       | .27         |
| Male sex                      | 34 (58%)              | 28 (67%)                         | .36         |
| Diabetes Mellitus             | 11 (19%)              | 7 (17%)                          | .80         |
| Chronic kidney disease        | 24 (41%)              | 11 (26%)                         | .13         |
| Immunosuppression             | 6 (10%)               | 5 (12%)                          | 1.00        |
| Cancer                        | 11 (19%)              | 13 (31%)                         | .15         |
| Charlson index, median, (IQR) | 4 (3-6)               | 4 (2-7)                          | .69         |
| Sepsis / septic shock         | 15 (25%)              | 7 (17%)                          | .29         |
| Pitt score, median (IQR)      | 0 (0-2)               | 0 (0-1)                          | <b>.004</b> |
| Nosocomial acquisition        | 19 (32%)              | 15 (36%)                         | .71         |
| Health-care associated        | 21 (36%)              | 11 (26%)                         | .32         |
| ESBL/ ampC Microorganism      |                       |                                  | .89         |
| <i>E. coli</i>                | 47 (80%)              | 33 (79%)                         |             |
| <i>K. pneumoniae</i>          | 12 (20%)              | 9 (21%)                          |             |
| Bloodstream infection source  |                       |                                  | .12         |

|                                                                      |             |            |                    |
|----------------------------------------------------------------------|-------------|------------|--------------------|
| <b>Urinary tract</b>                                                 | 34 (58%)    | 30 (71%)   |                    |
| <b>Biliary tract</b>                                                 | 12 (20%)    | 3 (7%)     |                    |
| <b>Catheter related</b>                                              | 2 (3%)      | 4 (10.3%)  |                    |
| <b>Source control <sup>a</sup></b>                                   | 10 (17%)    | 5 (12%)    | .48                |
| <b>Appropriate empirical therapy</b>                                 | 32 (54%)    | 13 (31%)   | .074               |
| <b>Partially appropriate <sup>b</sup></b>                            | 3 (5%)      | 4 (9%)     |                    |
| <b>Delay of appropriate therapy, days, median (IQR) <sup>c</sup></b> | 0 (0-3)     | 2 (0-3)    | .006               |
| <b>Empirical treatment duration, days, median (IQR)</b>              | 2 (2-4)     | 3 (2-3)    | .79                |
| <b>Definitive treatment duration, days, median (IQR)</b>             | 12 (7-14)   | 12 (10-14) | .23                |
| <b>OUTCOMES</b>                                                      |             |            |                    |
| <b>Hospital stay after BSI, median (IQR)</b>                         |             |            |                    |
| <b>Overall</b>                                                       | 12 (9-18)   | 7 (5-10)   | <b>&lt; 0.0001</b> |
| <b>Survivors</b>                                                     | 12 (8.5-18) | 7(4,25-10) | <b>&lt; 0.0001</b> |
| <b>Cure failure <sup>d</sup></b>                                     | 9 (15%)     | 2 (5%)     | .12                |
| <b>Relapse (30 days follow-up)</b>                                   | 3 (5%)      | 1 (2%)     | .64                |
| <b>Mortality (30 days follow-up)</b>                                 | 6 (10%)     | 2 (5%)     | .46                |

<sup>a</sup> Source control: any kind of intervention apart from antibiotic treatment to resolve the BSI (bloodstream infection) : e.g., surgical treatment, abscess drainage or catheter withdrawal. <sup>b</sup> Partially: the antibiotic was appropriate for part of the duration of the empiric treatment (e.g. the



patient received some days of appropriate treatment and some days of a non-appropriate antibiotic during the empiric therapy). <sup>c</sup>Delay of appropriate therapy: days without active treatment in terms of antibiotic susceptibility. <sup>d</sup> Cure failure includes bacteraemia persistence or recurrence/relapse.

Table 2. Clinical characteristics of patients with bloodstream infections caused by extended-spectrum b-lactamase-producing Enterobacteriaceae who received an alternative therapy as definitive treatment (carbapenem-sparing).

| Patient | Definitive treatment                                                      | Sepsis / septic shock | Microorganism              | BSI Source           | Death | Cure | Relapse |
|---------|---------------------------------------------------------------------------|-----------------------|----------------------------|----------------------|-------|------|---------|
| 1       | TMP-SMX <sup>a</sup> PO <sup>b</sup> / 1 DS <sup>c</sup> tid <sup>d</sup> | No                    | <i>E. coli</i>             | Urinary              | No    | Yes  | No      |
| 2       | TMP-SMX PO / 1 DS bid <sup>e</sup>                                        | No                    | <i>E. coli</i>             | Urinary              | No    | Yes  | No      |
| 3       | TMP-SMX PO / 1 DS bid                                                     | No                    | <i>E. coli</i>             | Urinary              | No    | Yes  | No      |
| 4       | TMP-SMX PO / 1 DS bid                                                     | Septic shock          | <i>K. pneumoniae amp C</i> | Catheter             | No    | Yes  | No      |
| 5       | TMP-SMX PO / 1 DS bid                                                     | Sepsis                | <i>K. pneumoniae amp C</i> | Urinary              | No    | Yes  | No      |
| 6       | TMP-SMX PO / 1 DS bid                                                     | No                    | <i>E. coli</i>             | Biliary              | No    | Yes  | No      |
| 7       | TMP-SMX PO / 1 DS bid                                                     | No                    | <i>E. coli</i>             | Urinary              | No    | Yes  | No      |
| 8       | TMP-SMX PO / 1 DS bid                                                     | No                    | <i>E. coli</i>             | Urinary              | Yes   | No   | No      |
| 9       | TMP-SMX PO / 1 DS bid                                                     | No                    | <i>E. coli</i>             | Urinary              | No    | Yes  | No      |
| 10      | TMP-SMX PO / 1 DS bid                                                     | No                    | <i>K. pneumoniae amp C</i> | Biliary              | No    | Yes  | No      |
| 11      | TMP-SMX PO / 1 DS bid                                                     | No                    | <i>K. pneumoniae amp C</i> | Urinary              | No    | Yes  | No      |
| 12      | TMP-SMX PO / 1 DS bid                                                     | No                    | <i>E. coli</i>             | Primary <sup>f</sup> | No    | Yes  | No      |
| 13      | TMP-SMX PO / 1 DS bid                                                     | No                    | <i>E. coli</i>             | Urinary              | No    | Yes  | No      |
| 14      | TMP-SMX PO / 1 DS bid                                                     | Sepsis                | <i>E. coli</i>             | Urinary              | No    | Yes  | No      |
| 15      | TMP-SMX PO / 1 DS bid                                                     | No                    | <i>E. coli</i>             | Bowel                | No    | Yes  | No      |
| 16      | TMP-SMX PO / 1 DS bid                                                     | No                    | <i>E. coli</i>             | Biliary              | No    | Yes  | No      |
| 17      | TMP-SMX PO / 1 DS bid                                                     | No                    | <i>E. coli</i>             | Urinary              | No    | Yes  | No      |
| 18      | TMP-SMX PO / 1 DS bid                                                     | No                    | <i>E. coli</i>             | Urinary              | No    | Yes  | No      |
| 19      | TMP-SMX PO / 1 DS bid                                                     | Septic shock          | <i>E. coli</i>             | Urinary              | No    | Yes  | No      |
| 20      | TMP-SMX PO / 1 DS bid                                                     | No                    | <i>K. pneumoniae</i>       | Urinary              | No    | Yes  | No      |
| 21      | TMP-SMX PO / 1 DS bid                                                     | Septic shock          | <i>E. coli</i>             | Urinary              | No    | Yes  | No      |

|    |                                                                |              |                            |           |     |     |     |
|----|----------------------------------------------------------------|--------------|----------------------------|-----------|-----|-----|-----|
| 22 | TMP-SMX PO/ 1 DS bid                                           | No           | <i>E. coli</i>             | Urinary   | Yes | No  | Yes |
| 23 | TMP-SMX PO/ 1 DS bid                                           | No           | <i>K. pneumoniae</i>       | Primary   | No  | Yes | No  |
| 24 | TMP-SMX PO/ 1 DS bid                                           | No           | <i>E. coli</i>             | Primary   | No  | Yes | No  |
| 25 | TMP-SMX PO/ 1 DS bid                                           | No           | <i>E. coli</i>             | Urinary   | No  | Yes | No  |
| 26 | Fosfomycin PO 500mg qid                                        | No           | <i>K. pneumoniae</i>       | Urinary   | No  | Yes | No  |
| 27 | Fosfomycin PO 500mg qid                                        | No           | <i>E. coli</i>             | Urinary   | No  | Yes | No  |
| 28 | Ciprofloxacin PO 500mg bid                                     | No           | <i>E. coli</i>             | Urinary   | No  | Yes | No  |
| 29 | Ciprofloxacin PO 500mg bid                                     | Septic shock | <i>E. coli</i>             | Urinary   | No  | Yes | No  |
| 30 | Ciprofloxacin PO 500mg bid                                     | No           | <i>K. pneumoniae Amp C</i> | Catheter  | No  | Yes | No  |
| 31 | Ciprofloxacin PO 500mg bid                                     | No           | <i>K. pneumoniae</i>       | Catheter  | No  | Yes | No  |
| 32 | Ciprofloxacin PO 500mg bid                                     | No           | <i>E. coli</i>             | Urinary   | No  | Yes | No  |
| 33 | Ciprofloxacin PO 750mg bid                                     | No           | <i>E. coli</i>             | Catheter  | No  | Yes | No  |
| 34 | Ciprofloxacin PO 500mg bid                                     | No           | <i>E. coli</i>             | Urinary   | No  | Yes | No  |
| 35 | Ciprofloxacin PO 500mg bid                                     | No           | <i>E. coli</i>             | Abdominal | No  | Yes | No  |
| 36 | Ciprofloxacin PO 500mg bid                                     | No           | <i>E. coli</i>             | Urinary   | No  | Yes | No  |
| 37 | Amoxicillin/clavulanate ER <sup>g</sup><br>PO 1000/62.5 mg qid | No           | <i>E. coli</i>             | Urinary   | No  | Yes | No  |
| 38 | Gentamicin IM <sup>h</sup> 240 mg qd                           | No           | <i>E. coli</i>             | Urinary   | No  | Yes | No  |
| 39 | Gentamicin IM 240 mg qd                                        | Sepsis       | <i>E. coli</i>             | Urinary   | No  | Yes | No  |
| 40 | Gentamicin 240 mg qd                                           | No           | <i>E. coli</i>             | Urinary   | No  | Yes | No  |
| 41 | Amikacin IM 1 g qd                                             | No           | <i>E. coli</i>             | Urinary   | No  | Yes | No  |
| 42 | Gentamicin 240 mg qd                                           | No           | <i>E. coli</i>             | Urinary   | No  | Yes | No  |

<sup>a</sup>TMP-SMX: Trimethoprim-Sulfamethoxazole. <sup>b</sup>PO: Oral administration. <sup>c</sup>DS: double strength. <sup>d</sup>tid: three times a day. <sup>e</sup>bid: twice a day <sup>f</sup>Primary: No source identified. <sup>g</sup>ER: extended release. <sup>h</sup>IM: intramuscular administration. <sup>i</sup>qd: once daily.

Table 3. Complete therapy regimen and duration of treatment of patients with bloodstream infections caused by extended-spectrum b-lactamase-producing Enterobacteriaceae who received an alternative therapy as definitive treatment (carbapenem-sparing).

| <b>Patient</b> | <b>Empiric Treatment (Appropriate)</b>            | <b>Duration, days</b> | <b>Effective modification treatment (Same as definitive)</b> | <b>Duration, days</b> | <b>Definitive treatment</b> | <b>Duration, days</b> |
|----------------|---------------------------------------------------|-----------------------|--------------------------------------------------------------|-----------------------|-----------------------------|-----------------------|
| <b>1</b>       | BL/BLIs <sup>a</sup> -Cephalosporin (No)          | 2                     | Carbapenem (No)                                              | 1                     | TMP-SMX <sup>b</sup>        | 28                    |
| <b>2</b>       | Quinolones-AMG <sup>c</sup> (No)                  | 5                     | TMP-SMX (Yes)                                                | 10                    |                             |                       |
| <b>3</b>       | Cephalosporin-Carbapenem (Partially) <sup>d</sup> | 4                     | Carbapenem (No)                                              | 5                     | TMP-SMX                     | 14                    |
| <b>4</b>       | Carbapenem (Yes)                                  | 3                     | Carbapenem (No)                                              | 6                     | TMP-SMX                     | 10                    |
| <b>5</b>       | BL/BLIs (Yes)                                     | 3                     | BL/BLIs (No)                                                 | 2                     | TMP-SMX                     | 8                     |
| <b>6</b>       | Carbapenem- BL/BLIs (Yes)                         | 6                     | TMP-SMX (Yes)                                                | 8                     |                             |                       |
| <b>7</b>       | BL/BLIs (Yes)                                     | 3                     | TMP-SMX (Yes)                                                | 9                     |                             |                       |
| <b>8</b>       | BL/BLIs (No)                                      | 3                     | Carbapenem (No)                                              | 3                     | TMP-SMX                     | 11                    |
| <b>9</b>       | BL/BLIs                                           | 1                     | TMP-SMX                                                      | 11                    |                             |                       |

|              |                              |   |            |    |         |    |
|--------------|------------------------------|---|------------|----|---------|----|
|              | (No)                         |   | (Yes)      |    |         |    |
| <b>10</b>    | BL/BLIs                      | 4 | TMP-SMX    | 13 |         |    |
|              | (No)                         |   | (Yes)      |    |         |    |
| <b>11</b>    | BL/BLIs                      | 3 | Carbapenem | 1  | TMP-SMX | 27 |
|              | (No)                         |   | (No)       |    |         |    |
| <b>12</b>    | Quinolones                   | 3 | TMP-SMX    | 14 |         |    |
|              | (No)                         |   | (Yes)      |    |         |    |
| <b>13</b>    | Cephalosporin                | 2 | TMP-SMX    | 21 |         |    |
|              | (No)                         |   | (Yes)      |    |         |    |
| <b>14</b>    | Carbapenem                   | 2 | Carbapenem | 4  | TMP-SMX | 14 |
|              | (Yes)                        |   | (No)       |    |         |    |
| <b>15</b>    | BL/BLIs-Quinolones           | 1 | Carbapenem | 3  | TMP-SMX | 7  |
|              | (No)                         |   | (No)       |    |         |    |
| <b>16</b>    | BL/BLIs                      | 2 | Carbapenem | 6  | TMP-SMX | 11 |
|              | (No)                         |   | (No)       |    |         |    |
| <b>17</b>    | Cephalosporin-<br>Quinolones | 2 | TMP-SMX    | 14 |         |    |
|              | (No)                         |   | (Yes)      |    |         |    |
| <b>18</b>    | Cephalosporin                | 3 | Carbapenem | 1  | TMP-SMX | 13 |
|              | (No)                         |   | (No)       |    |         |    |
| <b>19</b>    | Carbapenem- TMP-SMX          | 4 | TMP-SMX    | 11 |         |    |
|              | (Yes)                        |   | (Yes)      |    |         |    |
| <b>20</b>    | BL/BLIs- Carbapenem          | 3 | Carbapenem | 2  | TMP-SMX | 9  |
|              | (Yes)                        |   | (No)       |    |         |    |
| <b>21</b>    | Carbapenem                   | 3 | Carbapenem | 8  | TMP-SMX | 14 |
|              | (Yes)                        |   | (No)       |    |         |    |
| <b>22</b>    | BL/BLIs- Quinolones          | 2 | TMP-SMX    | 12 |         |    |
| <b>Death</b> | (No)                         |   | (Yes)      |    |         |    |
| <b>23</b>    | Cephalosporin                | 3 | TMP-SMX    | 18 |         |    |

|           |                     |   |            |    |                             |    |
|-----------|---------------------|---|------------|----|-----------------------------|----|
|           | (No)                |   | (Yes)      |    |                             |    |
| <b>24</b> | Cephalosporin       | 5 | TMP-SMX    | 19 |                             |    |
|           | (No)                |   | (Yes)      |    |                             |    |
| <b>25</b> | Quinolones          | 4 | TMP-SMX    | 15 |                             |    |
|           | (No)                |   | (Yes)      |    |                             |    |
| <b>26</b> | BL/BLIs- Carbapenem | 4 | Fosfomycin | 14 |                             |    |
|           | (Partially)         |   | (Yes)      |    |                             |    |
| <b>27</b> | Cephalosporin- AMG  | 2 | Carbapenem | 5  | Fosfomycin                  | 15 |
|           | (Partially)         |   | (No)       |    |                             |    |
| <b>28</b> | BL/BLIs             | 1 | Quinolones | 14 |                             |    |
|           | (No)                |   | (Yes)      |    |                             |    |
| <b>29</b> | Carbapenem          | 3 | Carbapenem | 7  | Quinolones                  | 10 |
|           | (Yes)               |   | (No)       |    |                             |    |
| <b>30</b> | BL/BLIs             | 2 | Carbapenem | 2  | Quinolones                  | 10 |
|           | (No)                |   | (No)       |    |                             |    |
| <b>31</b> | Aztreonam           | 2 | Quinolones | 14 |                             |    |
|           | (No)                |   | (Yes)      |    |                             |    |
| <b>32</b> | BL/BLIs             | 3 | Quinolones | 25 |                             |    |
|           | (Yes)               |   | (Yes)      |    |                             |    |
| <b>33</b> | Aztreonam           | 2 | AMG        | 2  | Quinolones                  | 10 |
|           | (No)                |   | (No)       |    |                             |    |
| <b>34</b> | BL/BLIs             | 2 | Quinolones | 16 |                             |    |
|           | (No)                |   | (Yes)      |    |                             |    |
| <b>35</b> | BL/BLIs             | 2 | Carbapenem | 6  | Quinolones                  | 8  |
|           | (Yes)               |   | (No)       |    |                             |    |
| <b>36</b> | Cephalosporin       | 5 | Quinolones | 10 |                             |    |
|           | (No)                |   | (Yes)      |    |                             |    |
| <b>37</b> | BL/BLIs             | 2 | Carbapenem | 2  | Amoxicillin-<br>clavulanate | 10 |
|           | (Yes)               |   | (No)       |    |                             |    |

|           |                            |   |                           |    |                  |   |
|-----------|----------------------------|---|---------------------------|----|------------------|---|
| <b>38</b> | BL/BLIs-AMG<br>(Partially) | 2 | AMG (Gentamicin)<br>(Yes) | 12 |                  |   |
| <b>39</b> | Cephalosporin<br>(No)      | 2 | Carbapenem<br>(No)        | 5  | AMG (Gentamicin) | 8 |
| <b>40</b> | Cephalosporin<br>(No)      | 3 | AMG<br>(Gentamycin)(Yes)  | 21 |                  |   |
| <b>41</b> | Cephalosporin<br>(No)      | 2 | Carbapenem<br>(No)        | 5  | AMG (Amikacin)   | 8 |
| <b>42</b> | Carbapenem<br>(Yes)        | 1 | Carbapenem<br>(No)        | 5  | AMG Gentamicin)  | 7 |

<sup>a</sup>BL/BLIs: b-lactam/b-lactamase inhibitor combinations. <sup>b</sup>TMP-SMX: Trimethoprim-Sulfamethoxazole. <sup>c</sup>AMG: Aminoglycoside. <sup>d</sup>Partially: the antibiotic was appropriate for part of the empiric treatment.

**Table 4. Univariate and multivariate analysis. Relation between variables and failure.**

| • UNIVARIATE ANALYSIS                       |                        | OR    | (95%CI)        | p-value      |
|---------------------------------------------|------------------------|-------|----------------|--------------|
| Age                                         |                        | 0.99  | ( 0.94; 1.03)  | 0.57         |
| Sex (male)                                  |                        | 1.79  | ( 0.44; 7.14)  | 0.42         |
| Diabetes Mellitus                           |                        | 0.43  | ( 0.05; 3.59)  | 0.43         |
| Chronic kidney disease                      |                        | 6.22  | ( 1.53; 25.27) | <b>0.011</b> |
| Immunosuppression                           |                        | 2.00  | ( 0.37; 10.73) | 0.42         |
| Cancer                                      |                        | 1.23  | ( 0.30; 5.07)  | 0.77         |
| Charlson Index                              |                        | 1.08  | ( 0.86; 1.35)  | 0.49         |
| Sepsis / Septic Shock                       |                        | 0.33  | ( 0.04; 2.72)  | 0.30         |
| Pitt score                                  |                        | 0.84  | ( 0.54; 1.29)  | 0.42         |
| Nosocomial acquisition                      |                        | 4.08  | ( 1.10; 15.11) | 0.03         |
| Health-care associated                      |                        | 1.94  | ( 0.55; 6.92)  | 0.30         |
| ESBL microorganism                          | <i>K. pneumoniae</i>   | 3.85  | ( 1.05;14.20)  | <b>0.042</b> |
| Bloodstream infection source <sup>1</sup>   | Urinary tract          | 1     |                | 0.52         |
|                                             | Catheter related       | 1.000 | ( 1.00; 1.00)  |              |
|                                             | Biliary tract          | 2.42  | ( 0.53; 11.04) |              |
|                                             | Other                  | 1.38  | ( 0.25; 7.59)  |              |
| Appropriate empirical therapy               | Yes                    | 0.70  | ( 0.18; 2.66)  | 0.84         |
|                                             | Partially <sup>b</sup> | 1.19  | ( 0.12; 11.71) |              |
| Delay of appropriate therapy <sup>a</sup>   |                        | 1.07  | ( 0.73; 1.57)  | 0.74         |
| Empirical treatment duration in days        |                        | 1.004 | ( 0.58; 1.72)  | 0.99         |
| Definitive treatment duration in days       |                        | 0.98  | ( 0.89; 1.09)  | 0.75         |
| Alternative non-IV treatment                |                        | 0.28  | ( 0.06; 1.35)  | 0.11         |
| Hospital stay after BSI <sup>b</sup>        |                        | 1.01  | ( 0.99; 1.04)  | 0.34         |
| • MULTIVARIATE ANALYSIS                     |                        | OR    | (95%CI)        | p-value      |
| Chronic kidney disease                      |                        | 11.19 | (1.84; 67.94)  | 0.009        |
| ESBL microorganism ( <i>K. pneumoniae</i> ) |                        | 7.86  | (1.16-53.41)   | 0.035        |
| Alternative non-IV treatment                |                        | 0.27  | (0.05-1.61)    | 0.15         |

<sup>a</sup> Delay of appropriate therapy: days without active treatment in terms of antibiotic susceptibility.

<sup>b</sup> BSI: bloodstream infection



**Table 5. Propensity score analysis.**

| VARIABLE                       |                       | OR   | (95% CI)      | p-value |
|--------------------------------|-----------------------|------|---------------|---------|
| Carbapenem group as definitive | Alternative treatment | 1    |               | 0.0587  |
|                                | Carbapenem            | 4.95 | ( 0.94;26.01) |         |

Figure 1. Flow chart

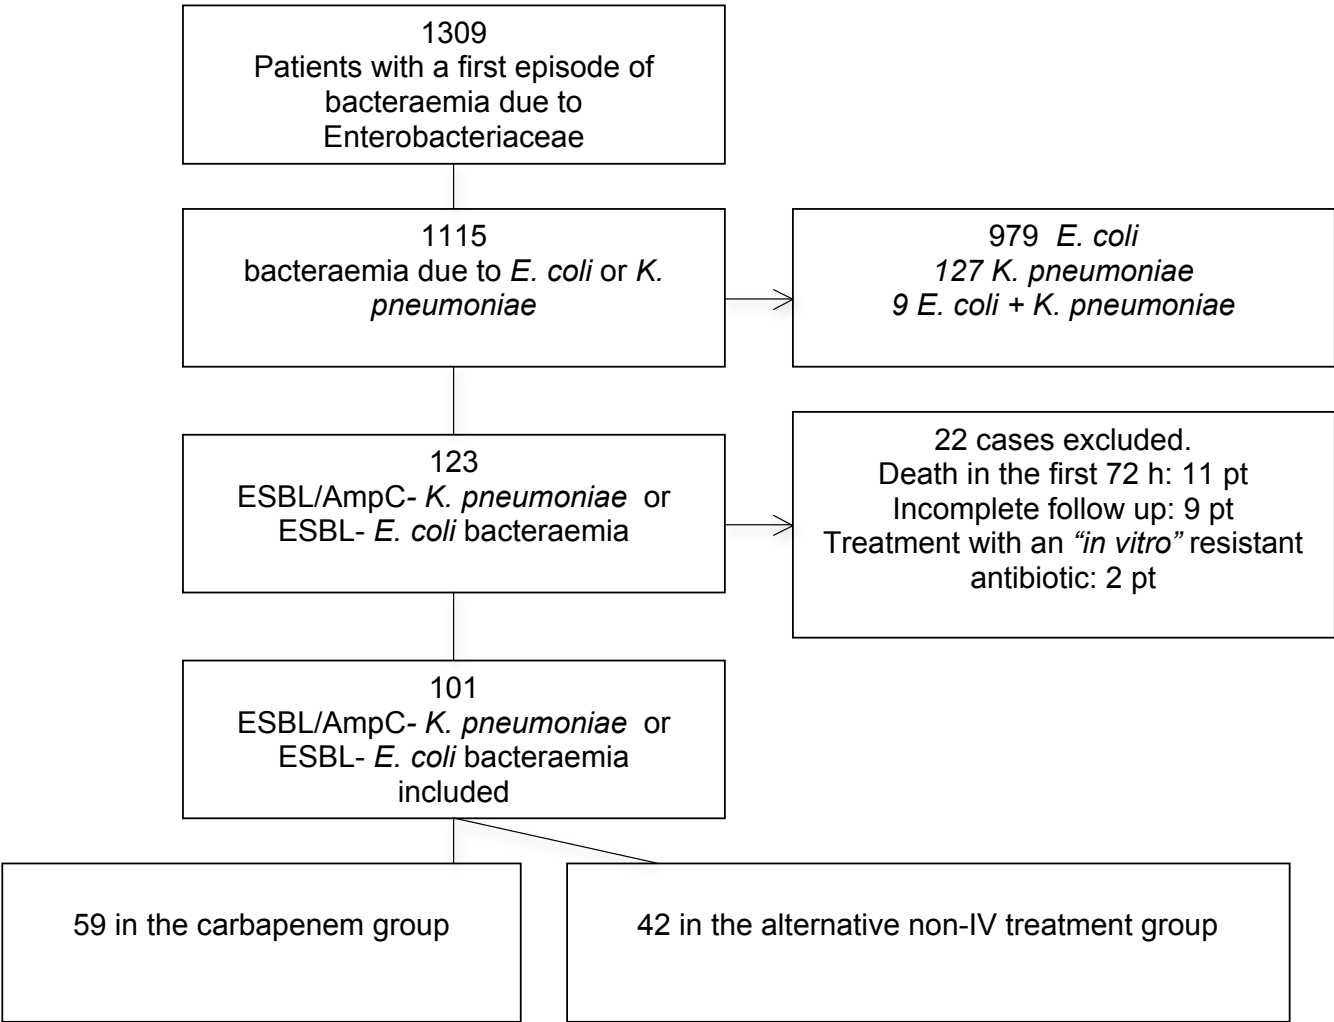

pt: patient
